# Supplementary material for: Direct 1,3-butadiene biosynthesis in Escherichia coli via a tailored ferulic acid decarboxylase mutant
Source: PubMed Central journal article supplement (PMC8044207; doi:10.1038/s41467-021-22504-6), 2021-04-13
Supplement: 41467_2021_22504_MOESM1_ESM.pdf [file 41467_2021_22504_MOESM1_ESM.pdf]

**Direct 1,3-butadiene biosynthesis in *Escherichia coli* via a tailored ferulic acid  
decarboxylase mutant**

Mori *et al.*

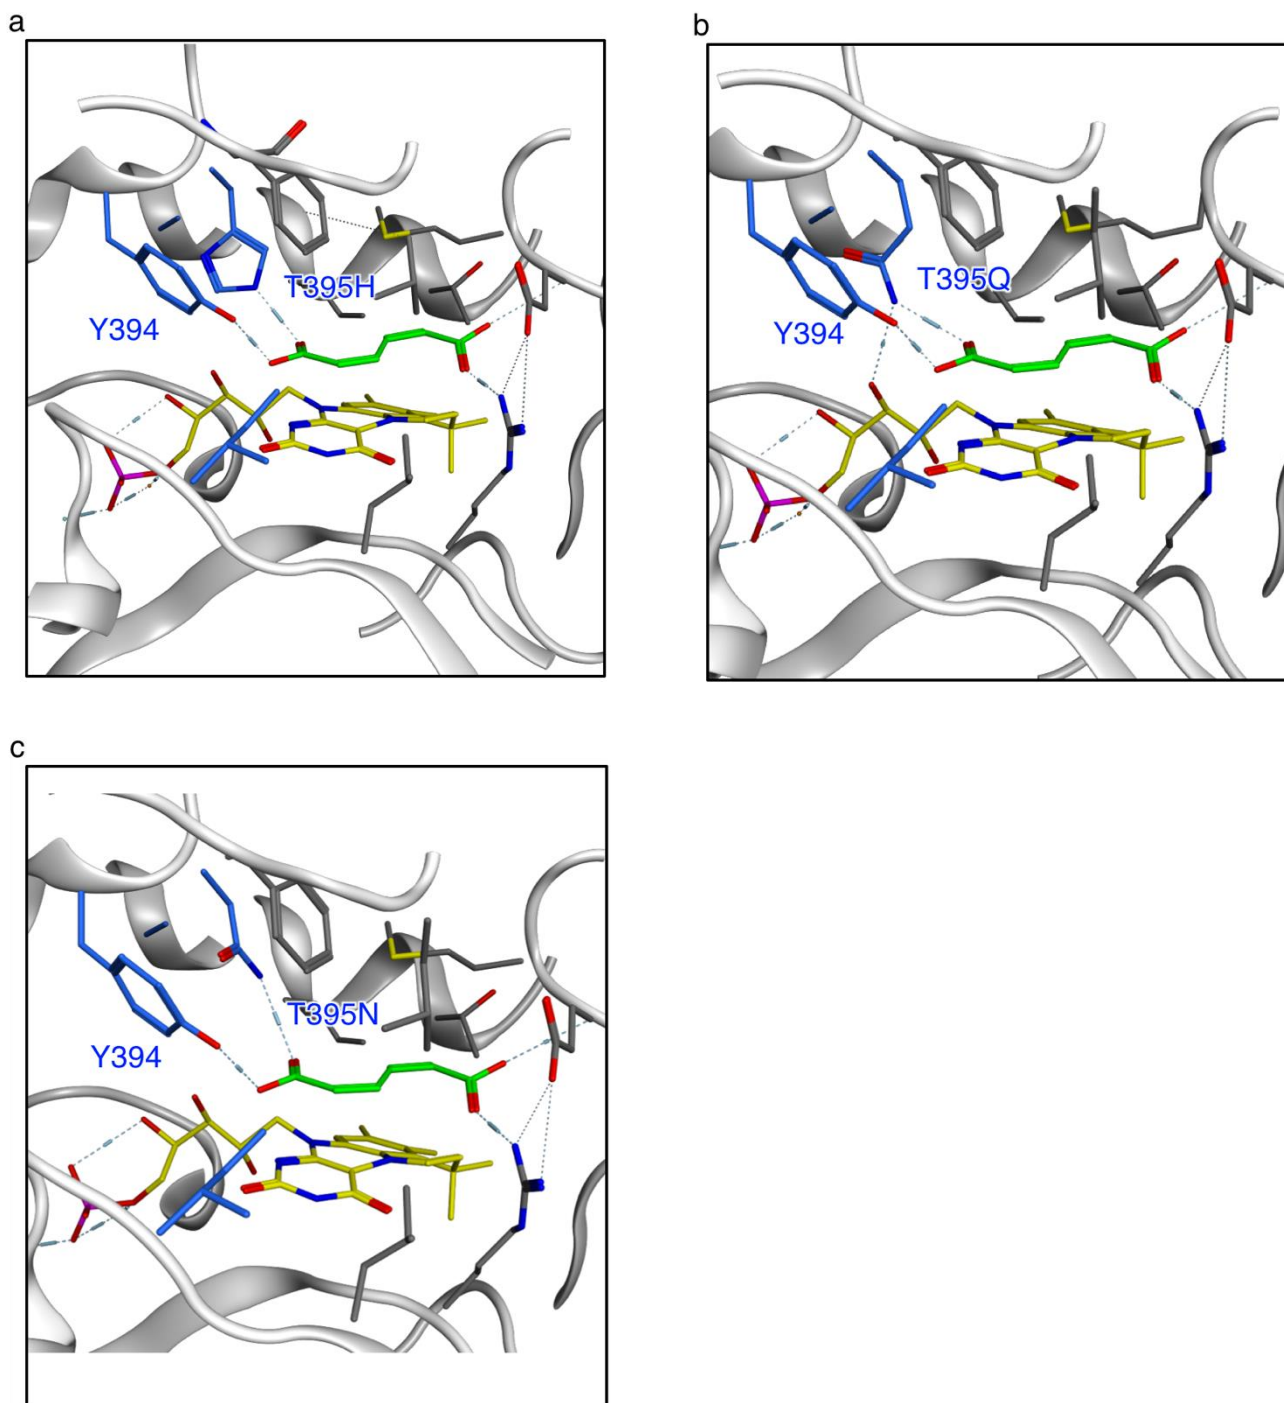

**Supplementary Fig. 1. Simulated active site of *AnFDC* mutants with bound *ccMA*.** Designed **a** *AnFDC* T395H, **b** *AnFDC* T395Q, and **c** *AnFDC* T395N. The negative hydrogen network and hydrophobic interactions are shown as dashed lines. *AnFDC*, ferulic acid decarboxylase derived from *Aspergillus niger*; *ccMA*, *cis,cis*-muconate.

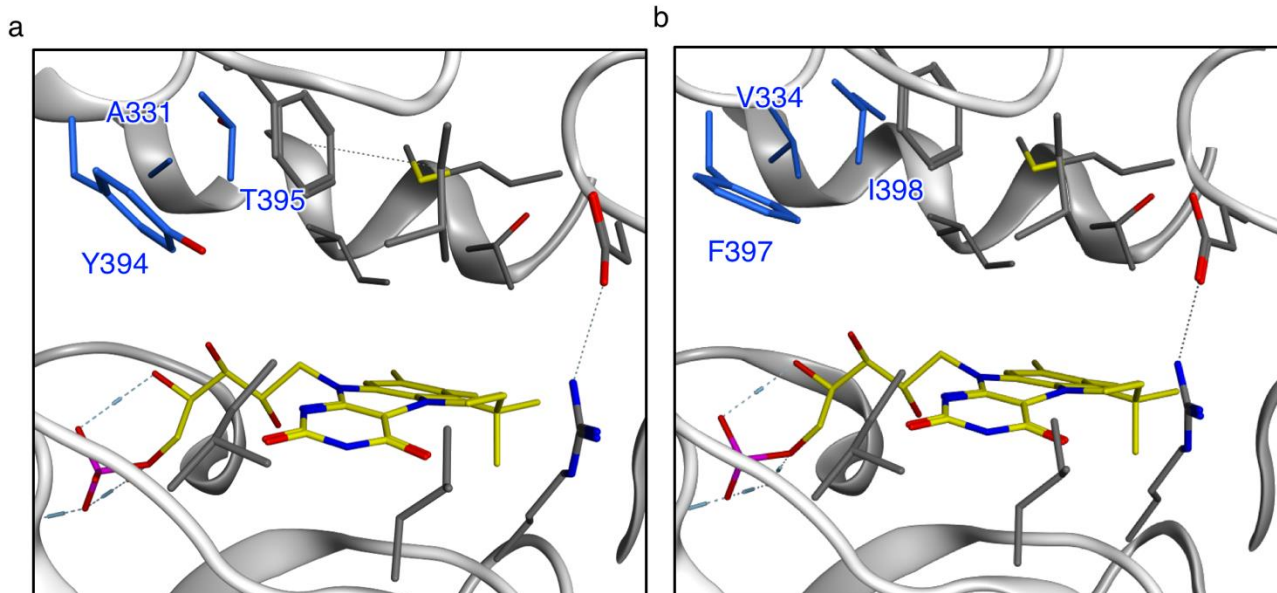

**Supplementary Fig. 2. Active site of a *AnFDC* and b *ScFDC*.** The negative hydrogen network and hydrophobic interactions are shown as dashed lines. *AnFDC*, ferulic acid decarboxylase derived from *Aspergillus niger*; *ScFDC*, ferulic acid decarboxylase derived from *Saccharomyces cerevisiae*.

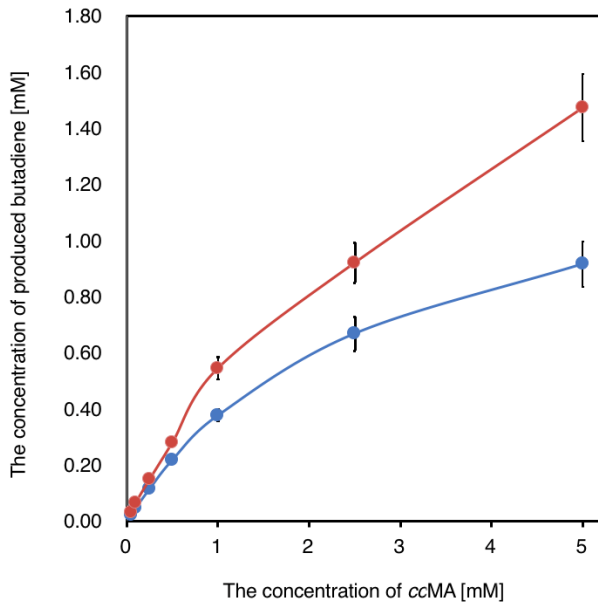

**Supplementary Fig. 3. Comparison of decarboxylation activity between *AnFDC Y394H:T395Q* and *ScFDC F397H:I398Q*.** Graph showing the amount of 1,3-butadiene produced by *AnFDC Y394H:T395Q* (blue) and *ScFDC F397H:I398Q* (red) at different *ccMA* concentrations after 24 h of culture. The data are presented as the means  $\pm$  SDs of three independent experiments ( $n = 3$ ). *ccMA*, *cis,cis*-muconic acid; SD, standard deviation. Source data are provided as a Source Data file.

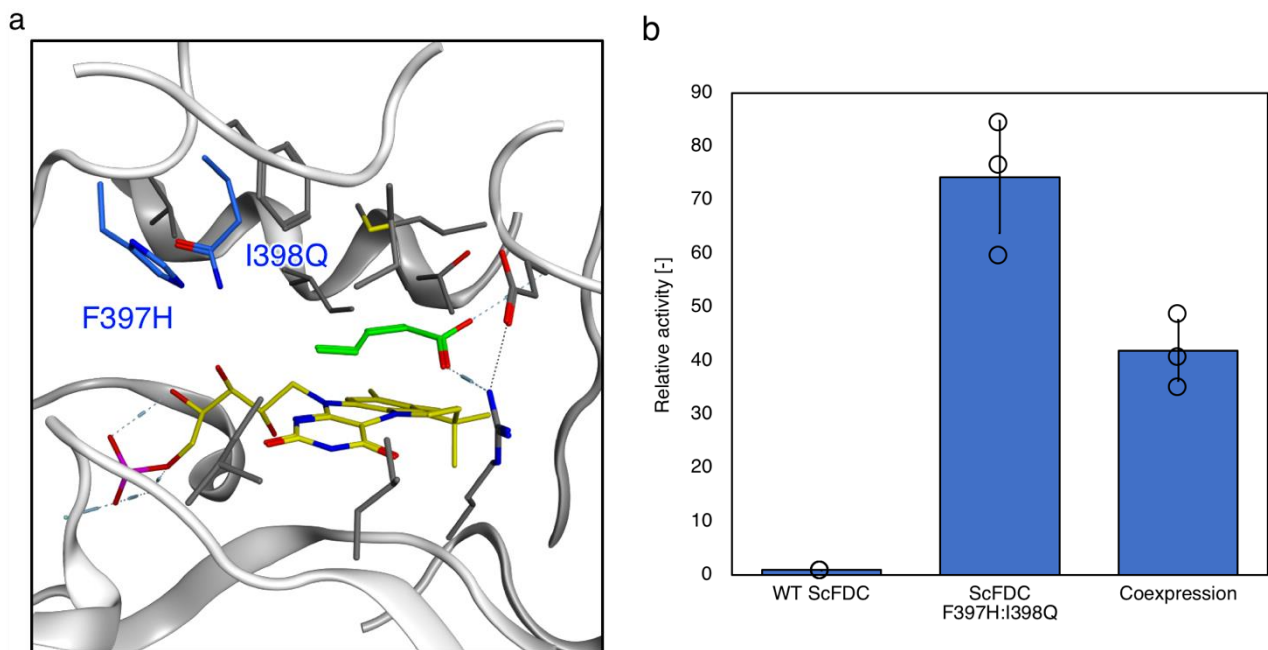

**Supplementary Fig. 4. Active site of ScFDC F387H:I398Q with bound PA (a) and decarboxylation activity of the combination of WT ScFDC and ScFDC F387H:I398Q (b).** The negative hydrogen network and hydrophobic interactions are shown as dashed lines. The data are presented as the means  $\pm$  SDs of three independent experiments ( $n = 3$ ). PA, pentadienoic acid; WT, wild type; ScFDC, ferulic acid decarboxylase derived from *Saccharomyces cerevisiae*; SD, standard deviation. Source data underlying Supplementary Figure 4b are provided as a Source Data file.

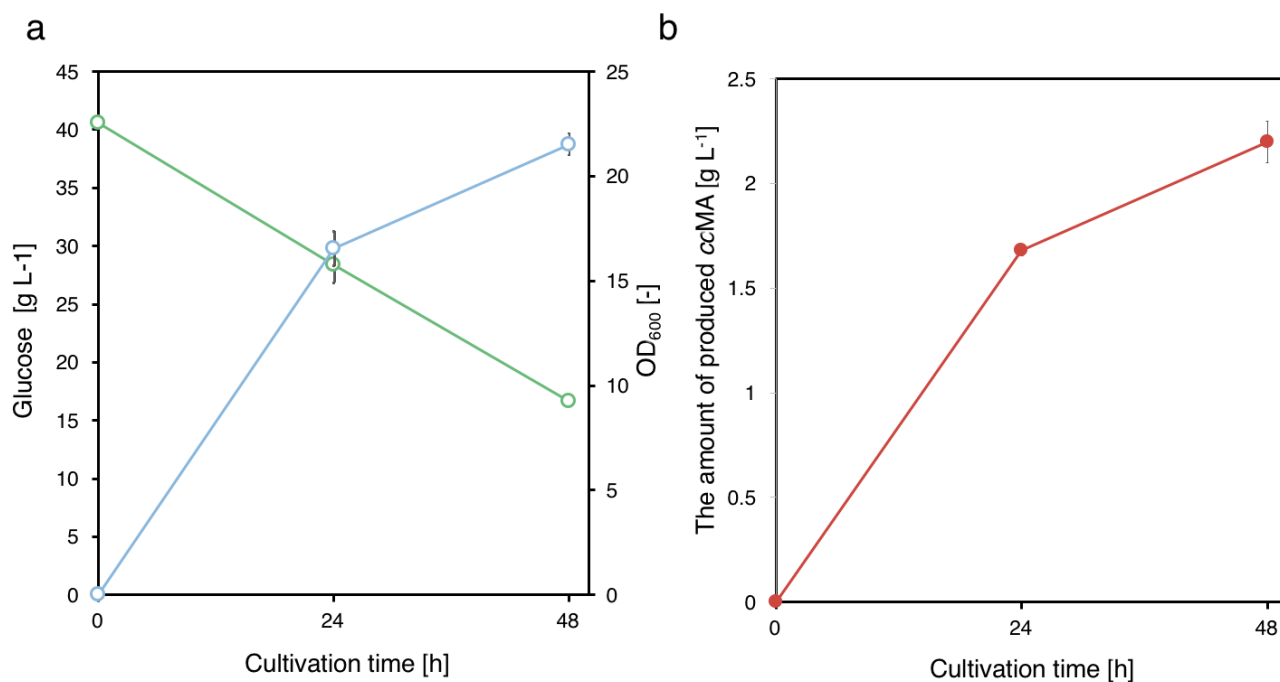

**Supplementary Fig. 5. Culture profiles of the *ccMA*-producing CFB22 strain.** Time courses of **a** bacterial cell growth (open blue circles) and glucose consumption (green open circles) and **b** the amount of *ccMA* produced (solid red circles). The data are presented as the means  $\pm$  SDs of three independent experiments ( $n = 3$ ). *ccMA*, *cis,cis*-muconic acid; SD, standard deviation. Source data are provided as a Source Data file.

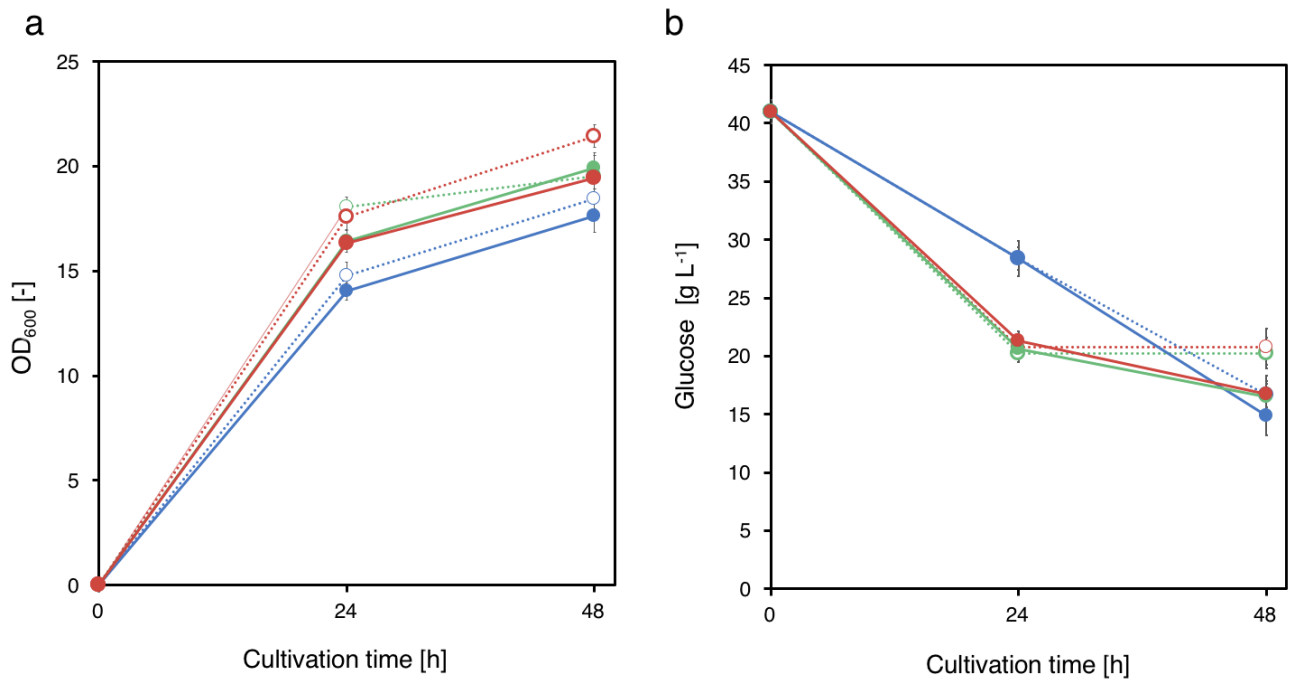

**Supplementary Fig. 6. Culture profiles of the 1,3-butadiene-producing strains CFB210–CFB222 under aerobic conditions (for 24 h) and packed culture conditions (for another 24 h).** Time courses of **a** bacterial cell growth and **b** glucose consumption. CFB210, open blue circles, dashed lines; CFB211, open green triangles, dashed lines; CFB212, open red squares, dashed lines; CFB220, solid blue circles, solid lines; CFB221, solid green triangles, solid lines; CFB222, solid red squares, solid lines. The data are presented as the means  $\pm$  SDs of three independent experiments ( $n = 3$ ). SD, standard deviation. Source data are provided as a Source Data file.

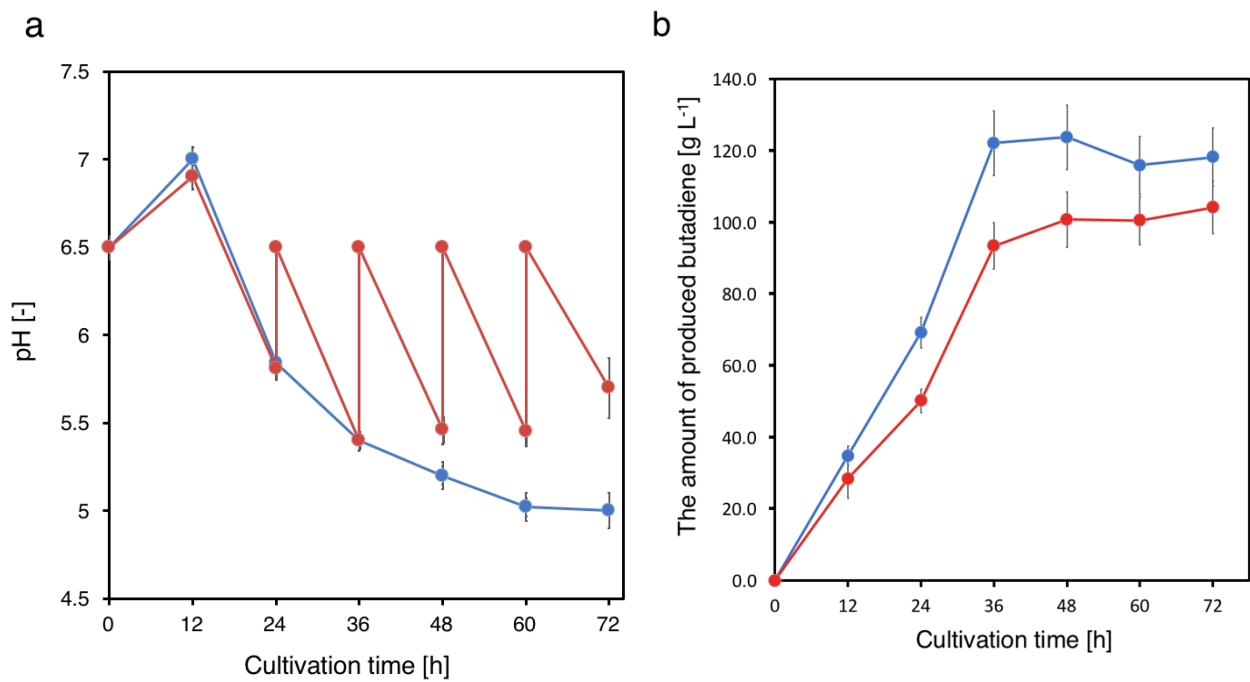

**Supplementary Fig. 7. Culture profiles of the 1,3-butadiene-producing CFB222 strain under microaerobic condition. a** Time courses of the pH and **b** 1,3-butadiene yield with (red) or without (blue) the pH adjusted to 6.5. The data are presented as the means  $\pm$  SDs of three independent experiments ( $n = 3$ ). SD, standard deviation. Source data are provided as a Source Data file.



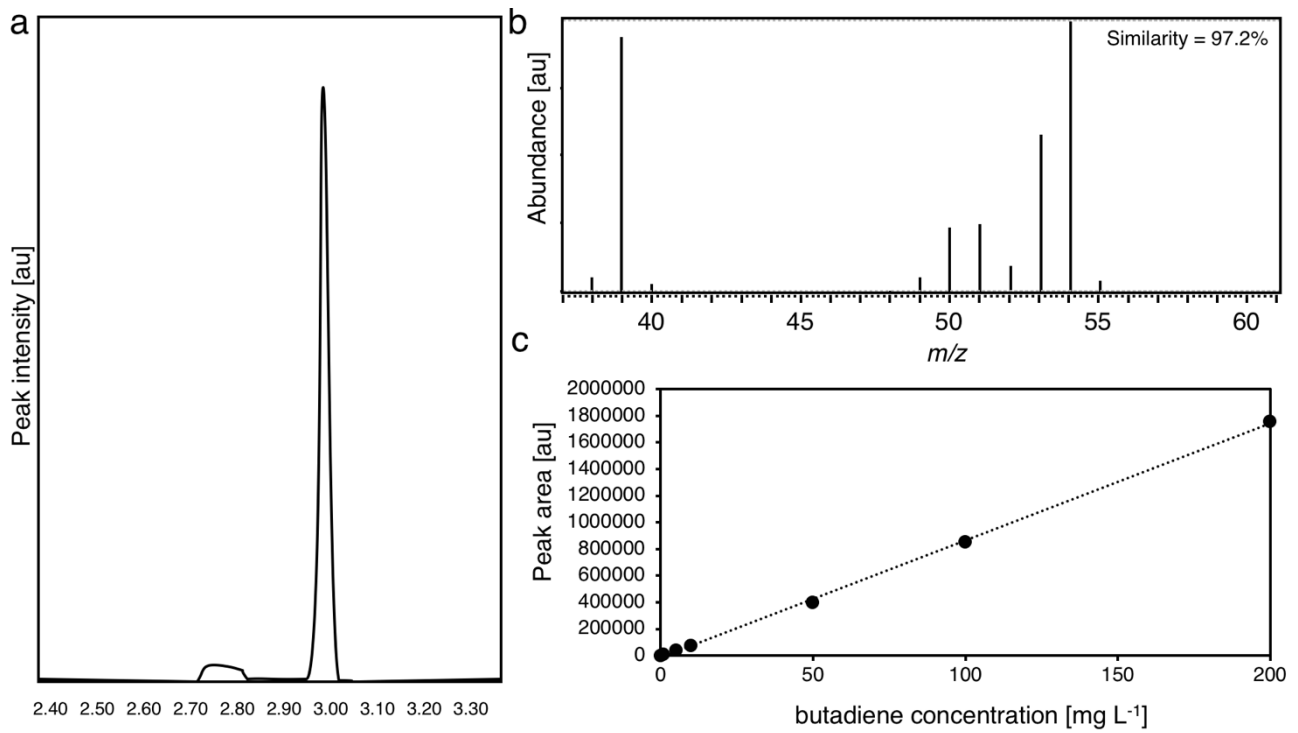

**Supplementary Fig. 8. 1,3-butadiene analysis profiles.** **a** Chromatogram and **b** mass spectrum via HS/GC–MS. **c** Calibration curve for 1,3-butadiene. HS/GC–MS, headspace/gas chromatography–mass spectrometry. Source data are provided as a Source Data file.

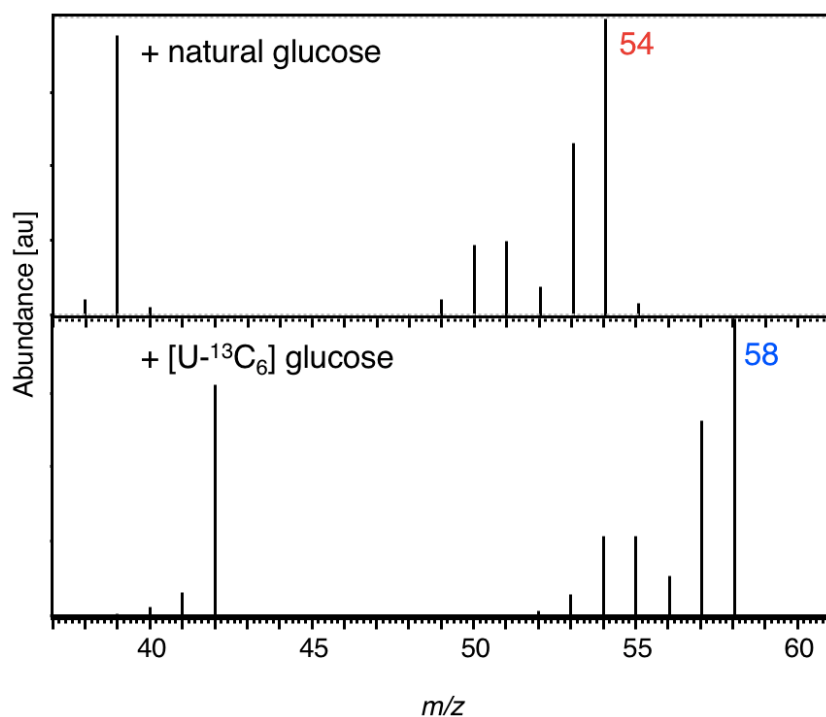

The relative area of each main peak is defined as 100 %

| $m/z$ | [M+0] | [M+1] | [M+2] | [M+3] | [M+4] |
|-------|-------|-------|-------|-------|-------|
| 54    | 100.0 | 66.8  | 11.6  | 25.5  | 29.0  |
| 55    | 0.0   | 100.0 | 66.8  | 11.6  | 25.5  |
| 56    | 0.0   | 0.0   | 100.0 | 66.8  | 11.6  |
| 57    | 0.0   | 0.0   | 0.0   | 100.0 | 66.8  |
| 58    | 0.0   | 0.0   | 0.0   | 0.0   | 100.0 |

**Supplementary Fig. 9. Mass spectrum of 1,3-butadiene produced during CFB222 culture when [U-<sup>13</sup>C<sub>6</sub>] glucose was used.** Each peak area distribution was created on the basis of its 1,3-butadiene standard.

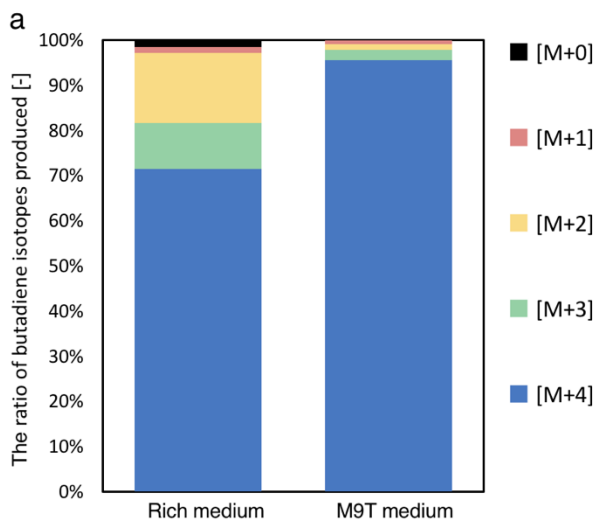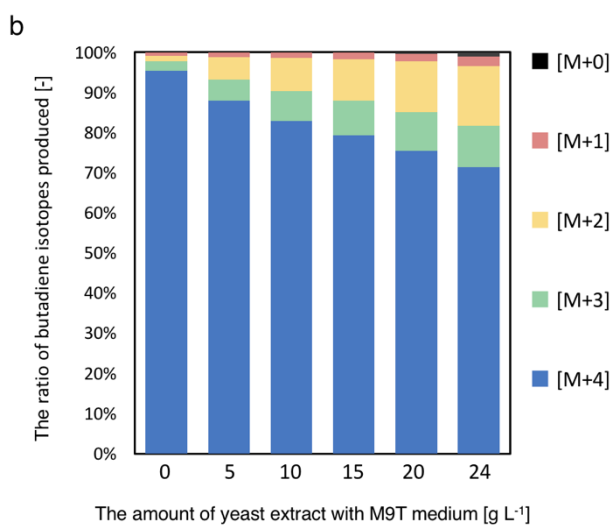

**Supplementary Fig. 10. 1,3-Butadiene isotope profiles of CFB222 culture in different media when [U-<sup>13</sup>C<sub>6</sub>] glucose is used. a** Ratio of butadiene isotopes produced when [U-<sup>13</sup>C<sub>6</sub>] glucose was used in rich media and M9T media. **b**, Ratio of butadiene isotopes produced when [U-<sup>13</sup>C<sub>6</sub>] glucose was used in M9T media with different concentrations of yeast extract. Source data are provided as a Source Data file.

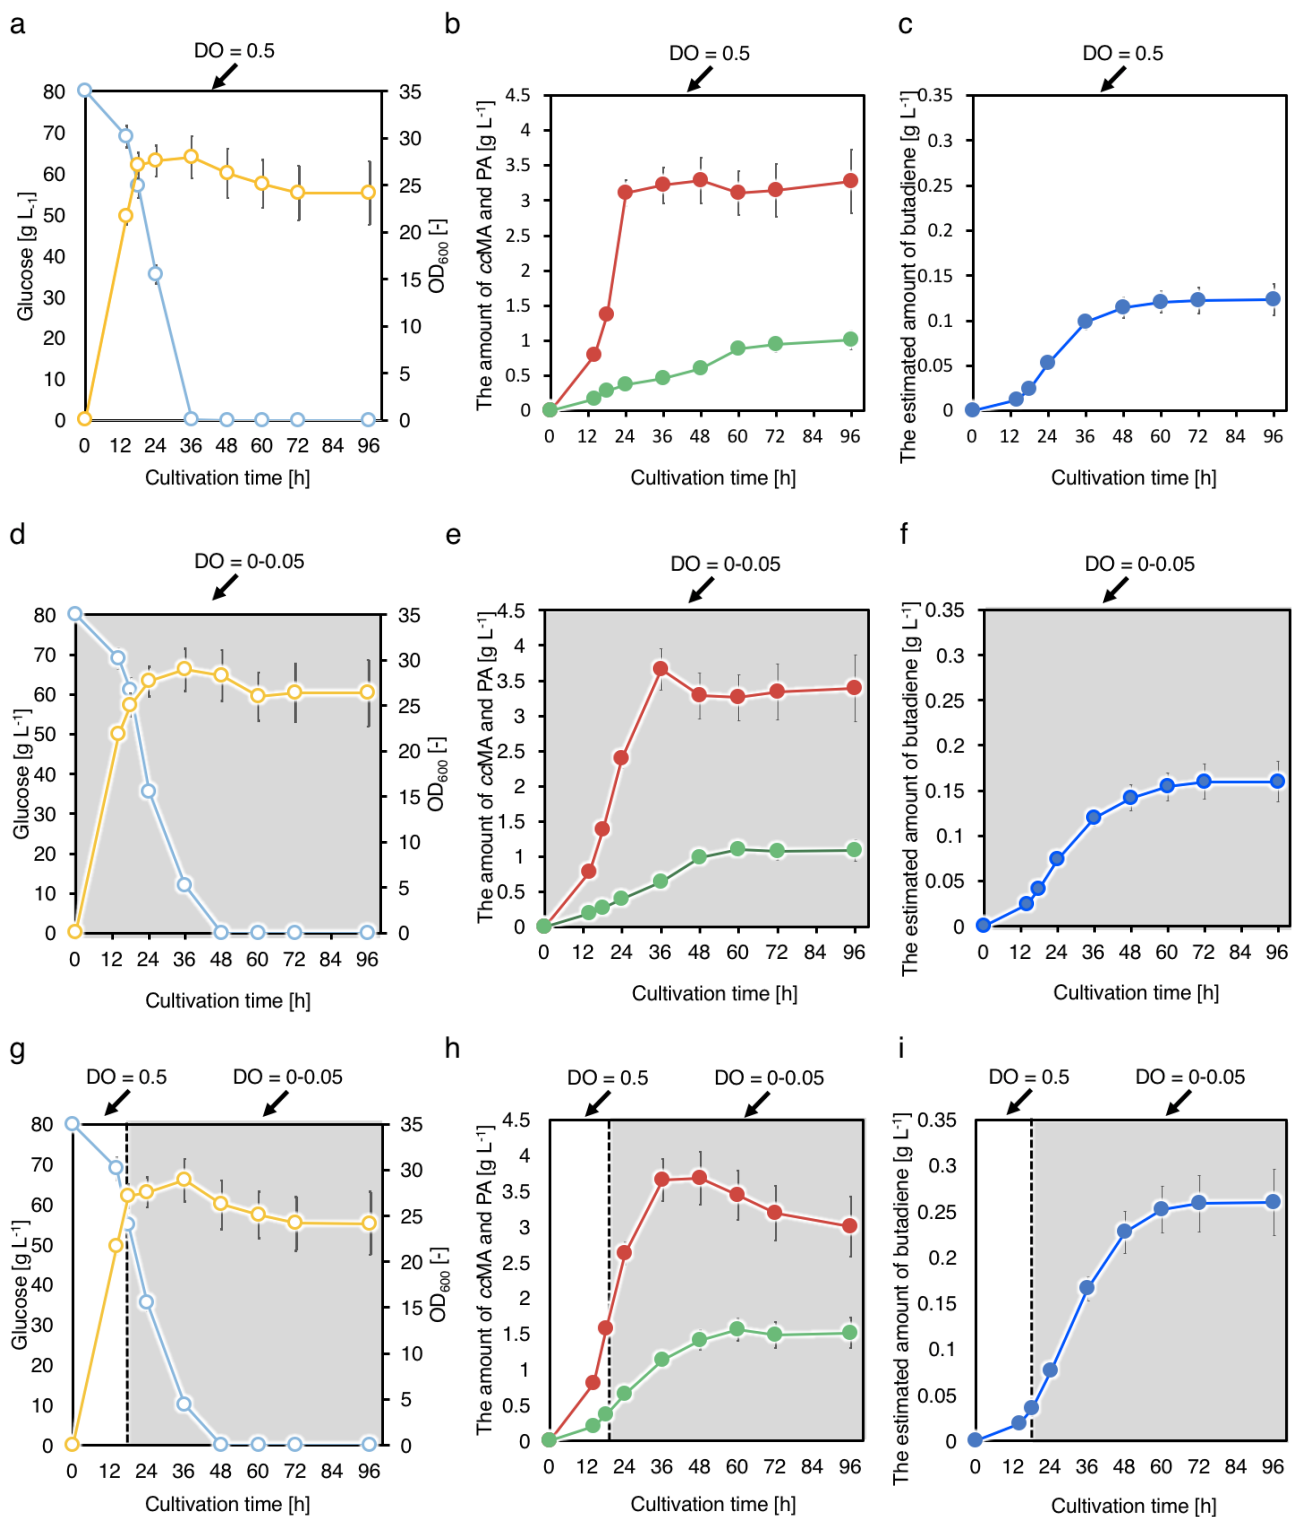

**Supplementary Fig. 11. Batch culturing of CFB222 in a 1-L jar fermenter under three different DO conditions at a pH of 7.0.** **a, b,** and **c** show the batch culture profile with DO maintained at 0.5 ppm (aerobic conditions) during the entire culture. **d, e,** and **f** show the batch culture profile with DO maintained at 0–0.05 ppm (microaerobic conditions) during the entire culture. **g, h,** and **i** show the batch culture with the DO shifted from 0.5 to 0–0.05 ppm at 18 h. **a, d, g** Time courses of bacterial cell growth (open yellow circles) and glucose concentration (open blue circles). **b, e, h** Time courses of *ccMA* (solid red squares) and *PA* (solid green triangles) yields. **c, f, i** Time courses of the estimated 1,3-butadiene yield (solid blue circles). The data are presented as the means  $\pm$  SDs of three independent experiments ( $n = 3$ ). *ccMA*, *cis,cis*-muconic acid; *PA*, pentadienoic acid; SD, standard deviation. Source data are provided as a Source Data file.

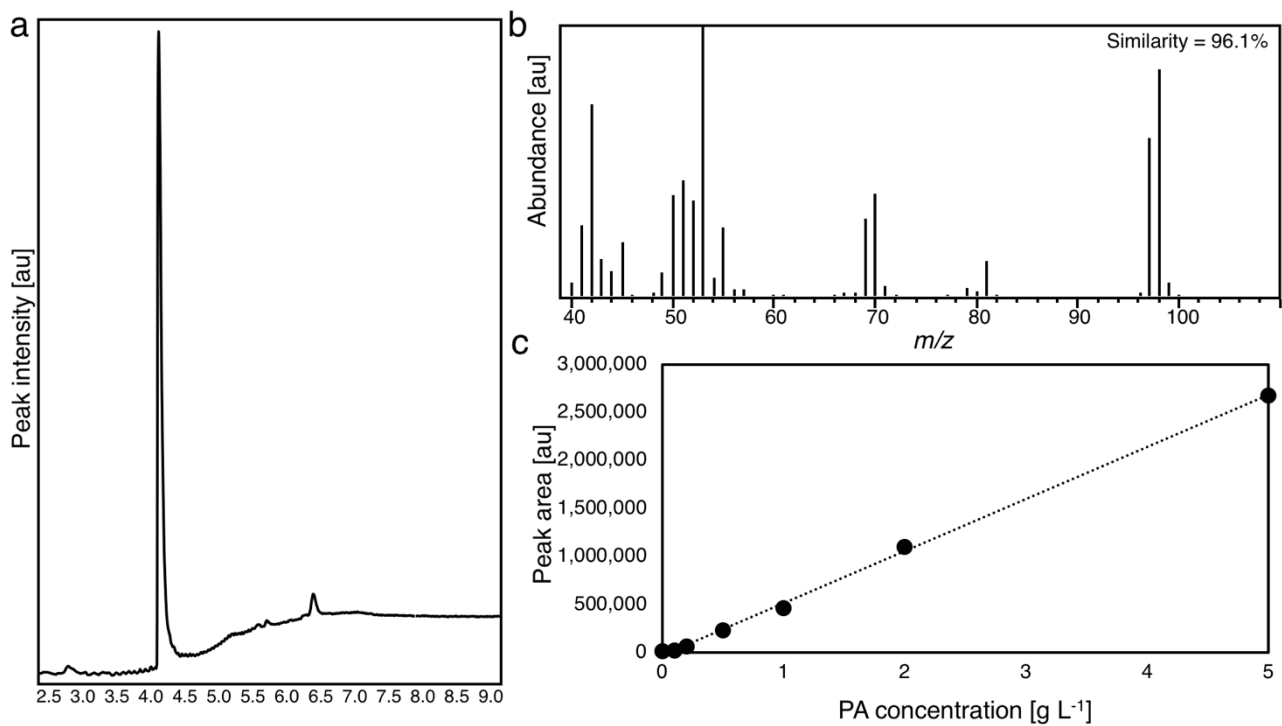

**Supplementary Fig. 12. PA analysis profiles.** **a** Chromatogram and **b** mass spectrum via GC-MS. **c** Calibration curve for PA. PA, pentadienoic acid; GC-MS, gas chromatography-mass spectrometry. Source data are provided as a Source Data file.

**Supplementary Table 1. Sequences of the combinatorial library of multiple mutants.**

| <b>Enzyme</b> | <b>Sequence</b> |       |       | <b>Enzyme</b> | <b>Sequence</b> |       |       |
|---------------|-----------------|-------|-------|---------------|-----------------|-------|-------|
| Wild type     | I187            | A331  | Y394  | AXX15         | I187N           | 331T  | Y394N |
| T395X_01      | I187N           | A331  | Y394  | T395X_16      | I187N           | 331T  | Y394Q |
| T395X_02      | I187H           | A331  | Y394  | T395X_17      | I187H           | 331T  | Y394  |
| T395X_03      | I187            | A331T | Y394  | T395X_18      | I187H           | A331T | Y394R |
| T395X_04      | I187            | A331  | Y394R | T395X_19      | I187H           | A331T | Y394H |
| T395X_05      | I187            | A331  | Y394H | T395X_20      | I187H           | A331T | Y394N |
| T395X_06      | I187            | A331  | Y394N | T395X_21      | I187H           | A331T | Y394Q |
| T395X_07      | I187            | A331  | Y394Q | T395X_22      | I187H           | 331T  | Y394R |
| T395X_08      | I187N           | A331T | Y394  | T395X_23      | I187H           | 331T  | Y394H |
| T395X_09      | I187N           | A331  | Y394R | T395X_24      | I187H           | 331T  | Y394N |
| T395X_10      | I187N           | A331  | Y394H | T395X_25      | I187H           | 331T  | Y394Q |
| T395X_11      | I187N           | A331  | Y394N | T395X_26      | I187            | 331T  | Y394R |
| T395X_12      | I187N           | A331  | Y394Q | T395X_27      | I187            | 331T  | Y394H |
| T395X_13      | I187N           | A331T | Y394R | T395X_28      | I187            | 331T  | Y394N |
| T395X_14      | I187N           | A331T | Y394H | T395X_29      | I187            | 331T  | Y394Q |

T395X: T395H, T395Q, or T395N was used as a template.

**Supplementary Table 2. Relative activity of the combinatorial library of multiple mutants.**

| Enzyme    | Relative activity | Enzyme   | Relative activity | Enzyme   | Relative activity |
|-----------|-------------------|----------|-------------------|----------|-------------------|
| Wild type | 1.0*              |          |                   |          |                   |
| T395H     | 67.5              | T395Q    | 109.3             | T395N    | 48.9              |
| T395H_01  | 362.1             | T395Q_01 | 142.1             | T395N_01 | 57.2              |
| T395H_02  | 131.1             | T395Q_02 | 252.0             | T395N_02 | 92.5              |
| T395H_03  | 39.6              | T395Q_03 | 119.3             | T395N_03 | 39.5              |
| T395H_04  | 6.5               | T395Q_04 | 87.5              | T395N_04 | 4.3               |
| T395H_05  | 156.2             | T395Q_05 | 1,002.1           | T395N_05 | 135.7             |
| T395H_06  | 77.7              | T395Q_06 | 393.4             | T395N_06 | 52.5              |
| T395H_07  | 29.0              | T395Q_07 | 206.9             | T395N_07 | 39.6              |
| T395H_08  | 335.8             | T395Q_08 | 131.9             | T395N_08 | 58.2              |
| T395H_09  | 6.5               | T395Q_09 | 22.2              | T395N_09 | 4.9               |
| T395H_10  | 476.5             | T395Q_10 | 964.5             | T395N_10 | 166.4             |
| T395H_11  | 333.2             | T395Q_11 | 347.7             | T395N_11 | 65.6              |
| T395H_12  | 79.5              | T395Q_12 | 242.9             | T395N_12 | 59.2              |
| T395H_13  | 13.0              | T395Q_13 | 10.9              | T395N_13 | 10.0              |
| T395H_14  | 472.9             | T395Q_14 | 818.0             | T395N_14 | 146.3             |
| T395H_15  | 138.4             | T395Q_15 | 370.2             | T395N_15 | 68.7              |
| T395H_16  | 0.0               | T395Q_16 | 164.4             | T395N_16 | 97.1              |
| T395H_17  | 72.0              | T395Q_17 | 346.5             | T395N_17 | 141.1             |
| T395H_18  | 6.6               | T395Q_18 | 21.2              | T395N_18 | 4.7               |
| T395H_19  | 138.6             | T395Q_19 | 990.4             | T395N_19 | 58.2              |
| T395H_20  | 119.0             | T395Q_20 | 459.2             | T395N_20 | 54.2              |
| T395H_21  | 6.6               | T395Q_21 | 195.8             | T395N_21 | 65.6              |
| T395H_22  | 13.4              | T395Q_22 | 21.5              | T395N_22 | 4.8               |
| T395H_23  | 80.1              | T395Q_23 | 841.5             | T395N_23 | 97.7              |
| T395H_24  | 72.2              | T395Q_24 | 10.9              | T395N_24 | 113.1             |
| T395H_25  | 0.0               | T395Q_25 | 130.1             | T395N_25 | 98.6              |
| T395H_26  | 6.4               | T395Q_26 | 10.9              | T395N_26 | 4.8               |
| T395H_27  | 118.7             | T395Q_27 | 972.7             | T395N_27 | 104.2             |
| T395H_28  | 53.6              | T395Q_28 | 152.9             | T395N_28 | 35.2              |
| T395H_29  | 0.0               | T395Q_29 | 129.4             | T395N_29 | 75.0              |

WT, wild type; AnFDC, ferulic acid decarboxylase derived from *Aspergillus niger*. \* The activity of WT AnFDC was defined as 1.0. Source data are provided as a Source Data file.

**Supplementary Table 3. Summary of the amount of glucose consumed and *cc*MA yield in CFB01, CFB11, and CFB21 cultures.**

|                                             | Strains |       |       |
|---------------------------------------------|---------|-------|-------|
|                                             | CFB01   | CFB11 | CFB21 |
| Consumed glucose (g L <sup>-1</sup> )       | 17.3    | 23.1  | 23.8  |
| Produced <i>cc</i> MA (g L <sup>-1</sup> )  | 0.54    | 2.17  | 2.52  |
| <i>cc</i> MA yield (mol mol <sup>-1</sup> ) | 0.040   | 0.119 | 0.134 |

*cc*MA: *cis,cis*-muconate. Source data are provided as a Source Data file.
